# Supplementary material for: Bilateral vestibulopathy: beyond imbalance and oscillopsia
Source: Springer Nature journal article supplement (doi:10.1007/s00415-020-10243-5), 2020-10-08
Supplement: MOESM1 [file 18463064]

## Supplemental materials

**Table 1. Bilateral vestibulopathy symptoms: Physical, Cognitive, Emotions**

|                                                                                             | First 18 patients (%) |              |
|---------------------------------------------------------------------------------------------|-----------------------|--------------|
| <b>Physical</b>                                                                             |                       |              |
| - <b>Imbalance</b>                                                                          | <b>100%</b>           | <b>18/18</b> |
| ○ Unsteadiness during walking or standing                                                   | 100%                  | 18/18        |
| ○ Falling                                                                                   | 44%                   | 8/18         |
| ○ Losing balance during fast movements                                                      | 61%                   | 11/18        |
| ○ Keeping balance while cycling                                                             | 89%                   | 16/18        |
| ○ Need of support/reference                                                                 | 89%                   | 16/18        |
| ○ Unsteadiness during other movements                                                       | 67%                   | 12/18        |
| - <b>Vision</b>                                                                             | <b>94%</b>            | <b>17/18</b> |
| ○ Oscillopsia                                                                               | 94%                   | 17/18        |
| ○ Visual vertigo                                                                            | 78%                   | 14/18        |
| ○ Reading difficulties                                                                      | 44%                   | 8/18         |
| - <b>No fast head movements</b>                                                             | <b>67%</b>            | <b>12/18</b> |
| - <b>Vertigo attacks</b>                                                                    | <b>33%</b>            | <b>6/18</b>  |
| - <b>Lightheadedness</b>                                                                    | <b>28%</b>            | <b>5/18</b>  |
| - <b>Tinnitus</b>                                                                           | <b>39%</b>            | <b>7/18</b>  |
| - <b>Tiredness</b>                                                                          | <b>67%</b>            | <b>12/18</b> |
| - <b>Neck pain</b>                                                                          | <b>22%</b>            | <b>4/18</b>  |
| - <b>Nausea</b>                                                                             | <b>22%</b>            | <b>4/18</b>  |
| - <b>Headache</b>                                                                           | <b>39%</b>            | <b>7/18</b>  |
| - <b>Restless mind</b>                                                                      | <b>17%</b>            | <b>3/18</b>  |
| - <b>Sleeping problems</b>                                                                  | <b>11%</b>            | <b>2/18</b>  |
| <b>Cognitive</b>                                                                            |                       |              |
| - <b>Difficulties with dual tasking</b>                                                     | <b>83%</b>            | <b>15/18</b> |
| - <b>Problems with spatial orientation</b>                                                  | <b>56%</b>            | <b>10/18</b> |
| ○ Disorientation                                                                            | 33%                   | 6/18         |
| ○ Misjudging distances                                                                      | 56%                   | 10/18        |
| - <b>Forgetfulness</b>                                                                      | <b>33%</b>            | <b>6/18</b>  |
| - <b>Concentration problems</b>                                                             | <b>39%</b>            | <b>7/18</b>  |
| <b>Emotions:</b>                                                                            |                       |              |
| - <b>Sadness</b>                                                                            | <b>83%</b>            | <b>15/18</b> |
| ○ Suffering                                                                                 | 28%                   | 5/18         |
| ▪ Suffering                                                                                 |                       |              |
| ○ Sadness                                                                                   | 61%                   | 11/18        |
| ▪ Depression, despair, hopelessness, gloom, sadness, unhappiness                            |                       |              |
| ○ Disappointment                                                                            | 17%                   | 3/18         |
| ▪ Disappointment, displeasure                                                               |                       |              |
| ○ Shame                                                                                     | 39%                   | 7/18         |
| ▪ Guilt, shame                                                                              |                       |              |
| ○ Neglect                                                                                   | 72%                   | 13/18        |
| ▪ Alienation, isolation, neglect, loneliness, rejection, defeat, insecurity, embarrassment. |                       |              |
| ○ Sympathy                                                                                  | 6%                    | 1/18         |
| ▪ Pity                                                                                      |                       |              |
| - <b>Fear</b>                                                                               | <b>83%</b>            | <b>15/18</b> |
| ○ Horror                                                                                    | 17%                   | 3/18         |
| ▪ Panic                                                                                     |                       |              |
| ○ Nervousness                                                                               | 78%                   | 14/18        |
| ▪ Anxiety, dread, tenseness, worry, uneasiness.                                             |                       |              |

|                   |            |             |
|-------------------|------------|-------------|
| - <b>Anger</b>    | <b>50%</b> | <b>9/18</b> |
| ○ Irritation      | 44%        | 8/18        |
| ▪ Irritation      |            |             |
| ○ Exasperation    | 22%        | 4/18        |
| ▪ Frustration     |            |             |
| ○ Rage            | 17%        | 3/18        |
| ▪ Anger, rage     |            |             |
| - <b>Love</b>     | <b>6%</b>  | <b>1/18</b> |
| ○ Affection       | 6%         | 1/18        |
| ▪ Fondness        |            |             |
| - <b>Joy</b>      | <b>11%</b> | <b>2/18</b> |
| ○ Contentment     | 6%         | 1/18        |
| ○ Optimism        | 33%        | 6/18        |
| ▪ Hope, optimism  |            |             |
| - <b>Surprise</b> | <b>0%</b>  | <b>0/18</b> |

## Parrot's Classification of Emotions (2001)

| Primary emotion | Secondary emotion | Tertiary emotion                                                                                                                                                       |
|-----------------|-------------------|------------------------------------------------------------------------------------------------------------------------------------------------------------------------|
| <b>Love</b>     | Affection         | Adoration, affection, love, fondness, liking, attraction, caring, tenderness, compassion, sentimentality                                                               |
|                 | Lust              | Arousal, desire, lust, passion, infatuation                                                                                                                            |
|                 | Longing           | Longing                                                                                                                                                                |
| <b>Joy</b>      | Cheerfulness      | Amusement, bliss, cheerfulness, gaiety, glee, jolliness, joviality, joy, delight, enjoyment, gladness, happiness, jubilation, elation, satisfaction, ecstasy, euphoria |
|                 | Zest              | Enthusiasm, zeal, zest, excitement, thrill, exhilaration                                                                                                               |
|                 | Contentment       | Contentment, pleasure                                                                                                                                                  |
|                 | Pride             | Pride, triumph                                                                                                                                                         |
|                 | Optimism          | Eagerness, hope, optimism                                                                                                                                              |
|                 | Enthrallment      | Enthrallment, rapture                                                                                                                                                  |
|                 | Relief            | Relief                                                                                                                                                                 |
| <b>Surprise</b> | Surprise          | Amazement, surprise, astonishment                                                                                                                                      |
| <b>Anger</b>    | Irritation        | Aggravation, irritation, agitation, annoyance, grouchiness, grumpiness                                                                                                 |
|                 | Exasperation      | Exasperation, frustration                                                                                                                                              |
|                 | Rage              | Anger, rage, outrage, fury, wrath, hostility, ferocity, bitterness, hate, loathing, scorn, spite, vengefulness, dislike, resentment                                    |
|                 | Disgust           | Disgust, revulsion, contempt                                                                                                                                           |
|                 | Envy              | Envy, jealousy                                                                                                                                                         |
|                 | Torment           | Torment                                                                                                                                                                |
| <b>Sadness</b>  | Suffering         | Agony, suffering, hurt, anguish                                                                                                                                        |
|                 | Sadness           | Depression, despair, hopelessness, gloom, glumness, sadness, unhappiness, grief, sorrow, woe, misery, melancholy                                                       |
|                 | Disappointment    | Dismay, disappointment, displeasure                                                                                                                                    |
|                 | Shame             | Guilt, shame, regret, remorse                                                                                                                                          |
|                 | Neglect           | Alienation, isolation, neglect, loneliness, rejection, homesickness, defeat, dejection, insecurity, embarrassment, humiliation, insult                                 |
|                 | Sympathy          | Pity, sympathy                                                                                                                                                         |
| <b>Fear</b>     | Horror            | Alarm, shock, fear, fright, horror, terror, panic, hysteria, mortification                                                                                             |
|                 | Nervousness       | Anxiety, nervousness, tenseness, uneasiness, apprehension, worry, distress, dread                                                                                      |
